# Supplementary material for: Aflibercept Traps Galectin-1, an Angiogenic Factor Associated with Diabetic Retinopathy
Source: PubMed Central journal article supplement (PMC4673700; doi:10.1038/srep17946), 2015-12-09
Supplement: srep17946-s1.pdf [file srep17946-s1.pdf]

# Aflibercept Traps Galectin-1, an Angiogenic Factor Associated with Diabetic Retinopathy

Atsuhiko Kanda, Kousuke Noda, Wataru Saito and Susumu Ishida

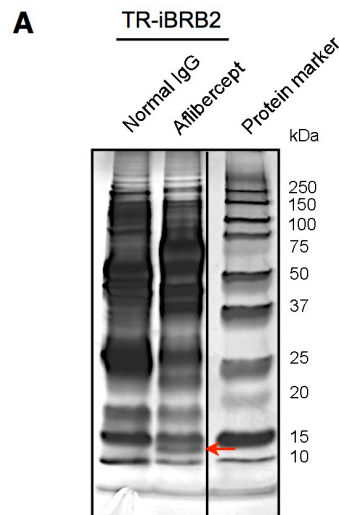

## B

| Identified protein | Gene name     | Molecular mass (Da) | No. of peptides | Score | Sequence coverage (%) | Calculated pI value | p value | Accession number |
|--------------------|---------------|---------------------|-----------------|-------|-----------------------|---------------------|---------|------------------|
| Galectin-1         | <i>Lgals1</i> | 14,857              | 16              | 249   | 80                    | 5.14                | < 0.05  | P11762           |

### Supplementary Figure S1. Molecular binding of aflibercept with galectin-1.

Rat retinal endothelial cell (TR-iBRB2) extracts were applied with aflibercept- or normal IgG-immobilized protein G beads. **A**, The eluted proteins were separated by SDS-PAGE and visualized with silver staining. A single protein band around 14 kDa was detected (red arrow). **B**, Summary of identified aflibercept-interacting protein.

## Aflibercept Traps Galectin-1, an Angiogenic Factor Associated with Diabetic Retinopathy

Atsuhiko Kanda, Kousuke Noda, Wataru Saito and Susumu Ishida

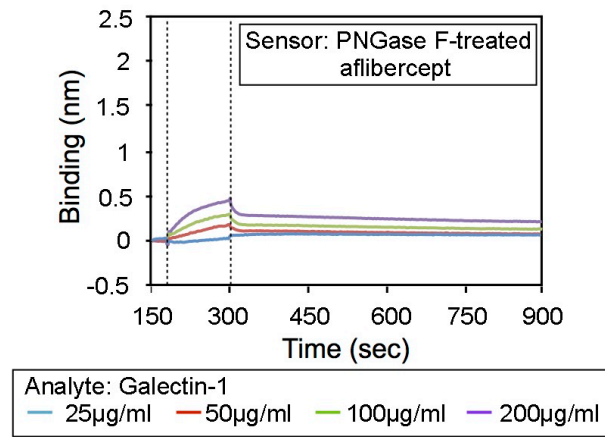

### Supplementary Figure S2. Binding affinity of deglycosylated aflibercept with galectin-1.

Sensorgrams obtained using biosensors loaded with PNGase F-treated aflibercept and incubated with different concentrations of galectin-1.
